# Supplementary material for: Astroglial Connexin 43 Regulates Synaptic Vesicle Release at Hippocampal Synapses
Source: MDPI journal article supplement (doi:10.3390/cells12081133), 2023-04-11
Supplement: s1 [file s1]

## Supplementary Materials

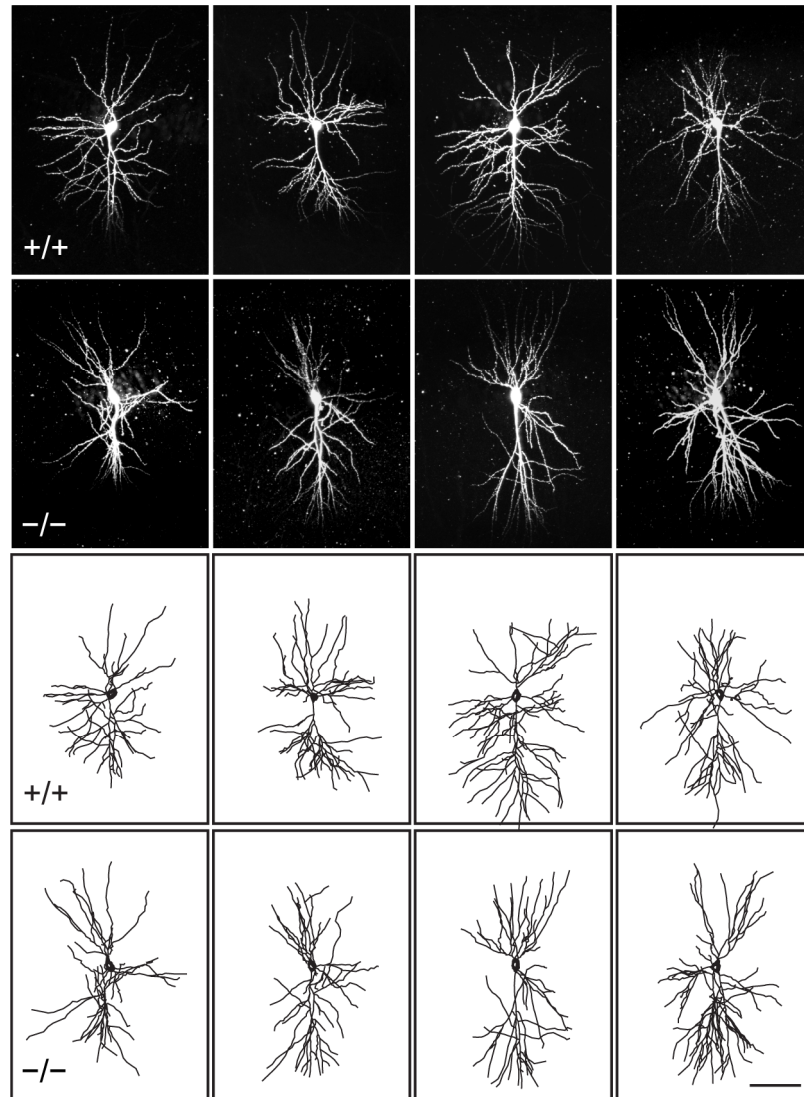

**Figure S1.** Dendritic morphology of CA1 pyramidal neurons is not changed in mice deficient for astroglial Cx43. Representative images of four hippocampal CA1 pyramidal neurons filled with sulforhodamine B via a patch pipette in wildtype (+/+, top) and Cx43  $-/-$  (-/-, second from top) mice. Maximum z-projection of confocal images are shown on the top two panels and reconstruction of the same neurons at the bottom two panels. Scale bar: 100  $\mu$ m.

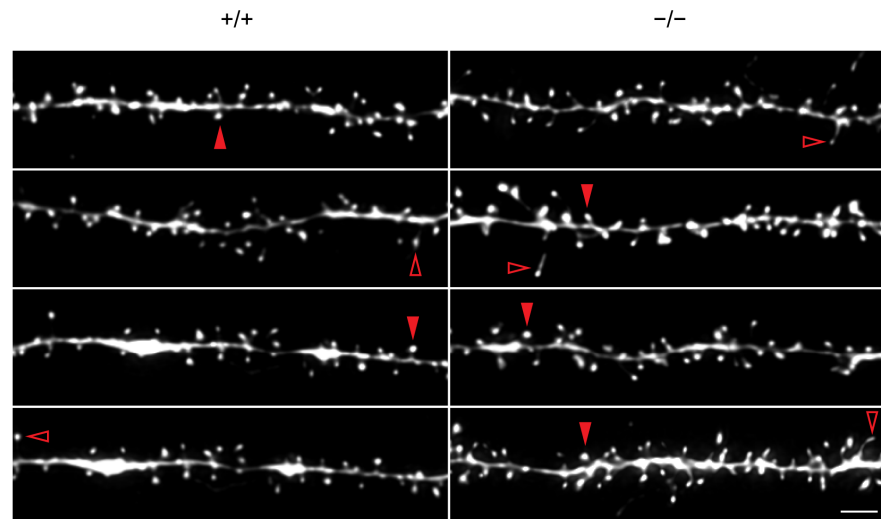

**Figure S2.** Dendritic spine properties of CA1 pyramidal neurons are unaltered in the absence of astroglial Cx43. Representative images of four dendritic segments of hippocampal CA1 pyramidal neurons filled with sulforhodamine B via a patch pipette in wild type (+/+, left) and Cx43  $-/-$  (-/-, right) mice. Maximum z-projection of confocal images containing dendritic spines are shown. Scale bar: 2  $\mu$ m. Open or filled red arrows denote representative thin/filopodia or stubby/mushroom spines, respectively.

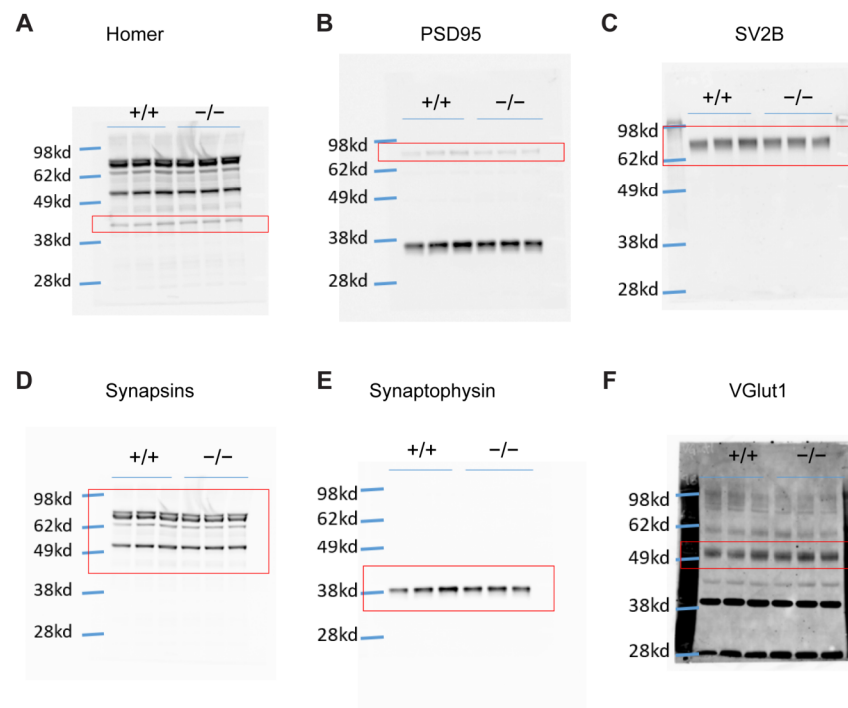

**Figure S3.** Original western blots shown in Figure 3. Original uncropped western blots used for protein quantification in Figure 3 are shown for (A) Homer, (B) PSD96, (C) SV2B, (D) Synapsins, (E) Synaptophysin, and (F) VGlut1.
